# Supplementary material for: Treating Cancer as an Invasive Species
Source: Oxford University Press journal article supplement (doi:10.1158/1541-7786.mcr-19-0262), 2019-09-16
Supplement: 15417786mcr190262-sup-218530_2_supp_5755831_pxd4gl.xlsx [file 15417786mcr190262-sup-218530_2_supp_5755831_pxd4gl.xlsx]

## Sheet: A. Island Data
Supplementary Table:
Table S1: (A) Summary of success rates for six mammalian invasive species under different eradication strategies. 95% confidence interval (CI) was calculated using binomial proportion CI with Jeffreys prior.
Type (Animal)	Primary Eradication Method	Failed	Successful	Total Count	Success Rate	95% CI low	95% CI high
Canid	Trapping	0	17	17	1	0.86	1
Lagomorph	Toxicant	1	34	35	0.97	0.87	1
Lagomorph	Hunting	1	15	16	0.94	0.74	0.99
Ungulate	Other	2	28	30	0.93	0.8	0.99
Ungulate	Hunting	9	121	130	0.93	0.88	0.97
Mustelid	Trapping	4	39	43	0.91	0.79	0.97
Felid	Toxicant	2	19	21	0.9	0.73	0.98
Felid	Trapping	4	37	41	0.9	0.78	0.97
Rodent	Toxicant	81	603	684	0.88	0.86	0.9
Rodent	Trapping	14	33	47	0.7	0.56	0.82
Canid	Toxicant	4	9	13	0.69	0.42	0.89
Felid	Hunting	5	11	16	0.69	0.44	0.87

## Sheet: B. Cancer Data
Supplementary Table:
Table S1: (B) Summary of success rates (Kaplan-Meier five-year survival rates) for different tumor types under different treatment options. 95% CI was calculated using exponential Greenwood CI for Kaplan-Meier estimator and beta product procedure.
tumor_type	first_therapy	cohort_size	died_before_5_years	died_after_5_years	at_risk_after_5_years	survival_rate	95%_CI_lower_expGreenwood	95%_CI_upper_expGreenwood	95%_CI_lower_bpcp	95%_CI_upper_bpcp
Testicular Germ Cell Tumors	Chemotherapy	56	0	1	30	1	N/A	N/A	0.88	1
Testicular Germ Cell Tumors	Radiotherapy	24	0	0	8	1	N/A	N/A	N/A	N/A
Thyroid Carcinoma	Endocrine therapy	24	0	0	1	1	N/A	N/A	N/A	N/A
Prostate Adenocarcinoma	Endocrine therapy	61	1	1	8	0.97	0.83	1	0.62	1
Breast Invasive Carcinoma	Endocrine therapy	139	4	1	12	0.94	0.83	0.98	0.7	0.99
Breast Invasive Carcinoma	Chemotherapy	422	16	5	116	0.93	0.88	0.96	0.87	0.96
Lymphoid Neoplasm Diffuse Large B-Cell Lymphoma	Chemotherapy/Immunotherapy/Steroid	27	2	1	6	0.92	0.73	0.98	0.51	0.99
Thymoma	Radiotherapy	40	3	2	14	0.9	0.71	0.97	0.67	0.98
Breast Invasive Carcinoma	Chemotherapy/Targeted molecular therapy	37	2	0	3	0.9	0.6	0.98	0.28	0.99
Prostate Adenocarcinoma	Radiotherapy	41	1	0	1	0.89	0.43	0.98	0.03	1
Thyroid Carcinoma	Radiotherapy	217	8	1	33	0.86	0.73	0.93	0.72	0.94
Breast Invasive Carcinoma	Chemotherapy/Endocrine therapy	20	1	1	3	0.86	0.33	0.98	0.25	1
Uterine Corpus Endometrial Carcinoma	Radiotherapy	130	11	3	28	0.85	0.74	0.92	0.72	0.93
Breast Invasive Carcinoma	Radiotherapy	96	9	2	16	0.77	0.58	0.88	0.56	0.9
Rectum Adenocarcinoma	Chemotherapy	51	6	0	4	0.75	0.44	0.9	0.3	0.93
Brain Lower Grade Glioma	Chemotherapy	72	14	6	13	0.7	0.53	0.82	0.49	0.83
Cervical Squamous Cell Carcinoma and Endocervical Adenocarcinoma	Radiotherapy	93	21	5	18	0.68	0.55	0.79	0.52	0.8
Cervical Squamous Cell Carcinoma and Endocervical Adenocarcinoma	Chemotherapy/Radiotherapy	41	11	1	9	0.66	0.46	0.8	0.41	0.82
Colon Adenocarcinoma	Chemotherapy	123	21	1	5	0.64	0.43	0.79	0.31	0.81
Uterine Corpus Endometrial Carcinoma	Chemotherapy	131	31	2	13	0.61	0.47	0.72	0.43	0.73
Brain Lower Grade Glioma	Radiotherapy	130	30	13	21	0.58	0.44	0.7	0.43	0.71
Skin Cutaneous Melanoma	Immunotherapy	29	9	2	9	0.57	0.33	0.76	0.32	0.79
Head and Neck Squamous Cell Carcinoma	Radiotherapy	170	55	7	19	0.57	0.45	0.66	0.43	0.67
Head and Neck Squamous Cell Carcinoma	Chemotherapy/Radiotherapy	64	21	0	4	0.54	0.35	0.69	0.23	0.71
Sarcoma	Chemotherapy	41	15	2	8	0.53	0.34	0.7	0.3	0.72
Lung Squamous Cell Carcinoma	Chemotherapy	112	37	3	12	0.52	0.39	0.64	0.35	0.65
Bladder Urothelial Carcinoma	Chemotherapy	97	36	0	12	0.5	0.35	0.63	0.33	0.64
Colon Adenocarcinoma	Chemotherapy/Targeted molecular therapy	20	6	0	3	0.49	0.14	0.77	0.13	0.82
Sarcoma	Radiotherapy	69	24	1	11	0.48	0.31	0.63	0.29	0.65
Brain Lower Grade Glioma	Chemotherapy/Radiotherapy	127	37	3	10	0.48	0.33	0.61	0.3	0.63
Head and Neck Squamous Cell Carcinoma	Chemotherapy	38	16	0	2	0.44	0.2	0.65	0.09	0.68
Cervical Squamous Cell Carcinoma and Endocervical Adenocarcinoma	Chemotherapy	37	14	0	3	0.43	0.22	0.63	0.13	0.67
Lung Adenocarcinoma	Chemotherapy	135	47	0	5	0.39	0.24	0.54	0.19	0.56
Skin Cutaneous Melanoma	Radiotherapy	92	52	5	15	0.36	0.25	0.47	0.24	0.48
Ovarian Serous Cystadenocarcinoma	Chemotherapy	479	240	42	97	0.33	0.28	0.38	0.28	0.39
Kidney Renal Clear Cell Carcinoma	Targeted molecular therapy	32	19	2	5	0.33	0.16	0.51	0.13	0.54
Stomach Adenocarcinoma	Chemotherapy	159	60	0	4	0.32	0.16	0.48	0.12	0.5
Bladder Urothelial Carcinoma	Radiotherapy	20	9	0	1	0.23	0.02	0.6	0.01	0.67
Kidney Renal Clear Cell Carcinoma	Radiotherapy	31	21	1	4	0.21	0.07	0.39	0.06	0.42
Skin Cutaneous Melanoma	Chemotherapy	34	18	0	2	0.2	0.04	0.43	0.03	0.47
Lung Adenocarcinoma	Radiotherapy	45	29	2	3	0.19	0.07	0.36	0.05	0.38
Liver Hepatocellular Carcinoma	Targeted molecular therapy	23	12	0	0	0.19	0.02	0.51	0	0.56
Lung Squamous Cell Carcinoma	Radiotherapy	27	16	0	2	0.18	0.04	0.41	0.03	0.46
Uterine Carcinosarcoma	Chemotherapy	26	14	0	0	0.18	0.01	0.49	0	0.54
Pancreatic Adenocarcinoma	Chemotherapy	85	33	0	1	0.15	0.04	0.32	0.01	0.35
Mesothelioma	Chemotherapy	30	26	2	2	0.1	0.03	0.24	0.02	0.27
Glioblastoma Multiforme	Chemotherapy/Radiotherapy	198	144	5	6	0.07	0.04	0.13	0.03	0.14
Glioblastoma Multiforme	Endocrine therapy	36	31	0	0	0.06	0.01	0.18	0	0.21
Glioblastoma Multiforme	Radiotherapy	95	73	2	4	0.06	0.02	0.13	0.02	0.14
Glioblastoma Multiforme	Chemotherapy	53	42	1	1	0.05	0.01	0.19	0	0.2
Esophageal Carcinoma	Chemotherapy/Radiotherapy	23	4	0	0	0	0	0	0	0.9
